# Supplementary material for: Adjuvant treatment for the elderly patient with resected gallbladder cancer: a SEER-Medicare analysis
Source: PubMed Central journal article supplement — J Gastrointest Oncol. 2022 Dec;13(6):3227–39. doi: 10.21037/jgo-22-348 (PMC9830355; doi:10.21037/jgo-22-348), 2022-12
Supplement: jgo-13-06-3227-supplementary.pdf [file jgo-13-06-3227-supplementary.pdf]

Table S1 Location codes

| Code      | Location/histology                      |
|-----------|-----------------------------------------|
| Location  |                                         |
| C22.0     | Liver <sup>a</sup>                      |
| C22.1     | Intrahepatic bile duct <sup>b</sup>     |
| C23.9     | Gallbladder                             |
| C24.0     | Extrahepatic bile duct <sup>c</sup>     |
| Histology |                                         |
| 8000      | Neoplasm, malignant                     |
| 8001      | Tumor cells, malignant                  |
| 8010      | Carcinoma, NOS                          |
| 8020      | Carcinoma, undifferentiated, NOS        |
| 8050      | Papillary carcinoma, NOS                |
| 8052      | Papillary squamous cell carcinoma       |
| 8070      | Squamous cell carcinoma, NOS            |
| 8140      | Adenocarcinoma, NOS                     |
| 8141      | Scirrhus adenocarcinoma                 |
| 8144      | Adenocarcinoma, intestinal type         |
| 8145      | Adenocarcinoma, diffuse type            |
| 8160      | Cholangiocarcinoma                      |
| 8162      | Klatskin tumor                          |
| 8210      | Adenocarcinoma in adenomatous polyp     |
| 8211      | Tubular adenocarcinoma                  |
| 8260      | Papillary adenocarcinoma                |
| 8480      | Mucinous adenocarcinoma                 |
| 8481      | Mucin producing adenocarcinoma          |
| 8560      | Adenosquamous carcinoma                 |
| 8570      | Adenocarcinoma with squamous metaplasia |
| 8576      | Hepatoid adenocarcinoma                 |

<sup>a</sup>, combined with histology code 8160 recoded to proximal cholangiocarcinoma and 8160 to intrahepatic cholangiocarcinoma; <sup>b</sup>, combined with histology code 8162 recoded to proximal cholangiocarcinoma; <sup>c</sup>, use site-specific factor 25 to differentiate between proximal and distal cholangiocarcinoma. NOS, not otherwise specified.

**Table S2** Additional patient characteristics used for PSM

|                                                     | No adjuvant therapy<br>(N=1,768) | Adjuvant chemotherapy<br>(N=411) | P value | No adjuvant<br>chemotherapy (N=405) | Adjuvant chemotherapy<br>(N=405) | P value |
|-----------------------------------------------------|----------------------------------|----------------------------------|---------|-------------------------------------|----------------------------------|---------|
| Percentage >24 years old with high school education |                                  |                                  |         |                                     |                                  |         |
| 1 <sup>st</sup> quartile                            | 453 (25.6%)                      | 99 (24.1%)                       | 0.66    | 93 (23.0%)                          | 98 (24.2%)                       | 0.88    |
| 2 <sup>nd</sup> quartile                            | 452 (25.6%)                      | 108 (26.3%)                      |         | 107 (26.4%)                         | 106 (26.2%)                      |         |
| 3 <sup>rd</sup> quartile                            | 412 (23.3%)                      | 106 (25.8%)                      |         | 98 (24.2%)                          | 103 (25.4%)                      |         |
| 4 <sup>th</sup> quartile                            | 451 (25.5%)                      | 98 (23.8%)                       |         | 107 (26.4%)                         | 98 (24.2%)                       |         |
| Median household income <sup>a</sup>                |                                  |                                  |         |                                     |                                  |         |
| 1 <sup>st</sup> quartile                            | 449 (25.4%)                      | 101 (24.6%)                      | 0.89    | 92 (22.7%)                          | 99 (24.4%)                       | 0.89    |
| 2 <sup>nd</sup> quartile                            | 427 (24.2%)                      | 104 (25.3%)                      |         | 100 (24.7%)                         | 102 (25.2%)                      |         |
| 3 <sup>rd</sup> quartile                            | 438 (24.8%)                      | 106 (25.8%)                      |         | 114 (28.1%)                         | 105 (25.9%)                      |         |
| 4 <sup>th</sup> quartile                            | 453 (25.6%)                      | 100 (24.3%)                      |         | 99 (24.4%)                          | 99 (24.4%)                       |         |
| Poverty                                             |                                  |                                  |         |                                     |                                  |         |
| <5%                                                 | 368 (20.8%)                      | 88 (21.4%)                       | 0.38    | 85 (21.0%)                          | 86 (21.2%)                       | 0.95    |
| 5–10%                                               | 455 (25.7%)                      | 116 (28.2%)                      |         | 106 (26.2%)                         | 112 (27.7%)                      |         |
| 10–20%                                              | 512 (29.0%)                      | 124 (30.2%)                      |         | 127 (31.4%)                         | 124 (30.6%)                      |         |
| >20%                                                | 414 (23.4%)                      | 81 (19.7%)                       |         | 86 (21.2%)                          | 81 (20.0%)                       |         |

<sup>a</sup>, 2 missing values. PSM, propensity-score matching.

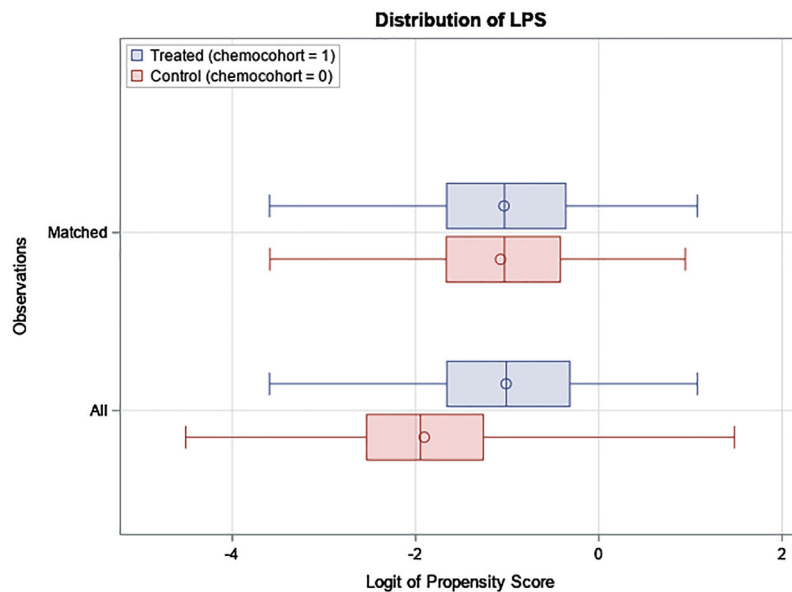

**Figure S1** Distribution of the Logit propensity score (LPS), before and after matching.

**Table S3** Adjusted interaction between receipt of chemotherapy and T/N-classification in the matched cohort in patients with survival >30 days postoperatively

| Factor                                                                | HR    | 95% CI      | P value |
|-----------------------------------------------------------------------|-------|-------------|---------|
| pN-stage stratified according to receipt of chemotherapy (yes vs. no) |       |             |         |
| N0                                                                    | 1.017 | 0.799–1.293 | 0.893   |
| N1/N2                                                                 | 0.795 | 0.598–1.057 | 0.115   |
| pN-stage stratified according to receipt of chemotherapy (yes vs. no) |       |             |         |
| T1                                                                    | 1.466 | 0.777–2.767 | 0.238   |
| T2                                                                    | 1.179 | 0.868–1.600 | 0.292   |
| T3                                                                    | 0.791 | 0.615–1.018 | 0.069   |
| T4                                                                    | 0.475 | 0.242–0.932 | 0.031   |

**Table S4** Adjusted interaction analysis between T-/N- classification, differentiation grade, receipt of aCT and survival in patients with survival >30 days postoperatively

| Group                 | aCT (N) | No aCT (N) | HR   | 95% CI    | P value |
|-----------------------|---------|------------|------|-----------|---------|
| T1/T2, N0             |         |            |      |           |         |
| Well/moderate         | 85      | 86         | 1.31 | 0.86–1.98 | 0.207   |
| Poor/undifferentiated | 53      | 54         | 1.03 | 0.61–1.74 | 0.906   |
| T1/T2, N1/N2          |         |            |      |           |         |
| Well/moderate         | 32      | 29         | 1.30 | 0.67–2.51 | 0.441   |
| Poor/undifferentiated | 34      | 26         | 1.35 | 0.68–2.70 | 0.393   |
| T3/T4, N0             |         |            |      |           |         |
| Well/moderate         | 47      | 47         | 1.05 | 0.65–1.69 | 0.845   |
| Poor/undifferentiated | 61      | 54         | 0.81 | 0.54–1.23 | 0.323   |
| T3/T4, N1/N2          |         |            |      |           |         |
| Well/moderate         | 43      | 33         | 0.86 | 0.51–1.43 | 0.555   |
| Poor/undifferentiated | 49      | 38         | 0.43 | 0.27–0.68 | <0.001  |

aCT, adjuvant chemotherapy.
